# Supplementary material
Source: ML conference proceedings conference paper supplement (https://openaccess.thecvf.com/content/ICCV_2017/html/Yuan_Temporal_Dynamic_Graph_ICCV_2017_paper.html)
Supplement: Supplementary file 1 [file Yuan_Temporal_Dynamic_Graph_ICCV_2017_supplemental.pdf]

## Supplementary Materials for Temporal Dynamic Graph LSTM for Action-driven Video Object Detection

We visualize more detection results of the TD-Graph LSTM on the Charades dataset.

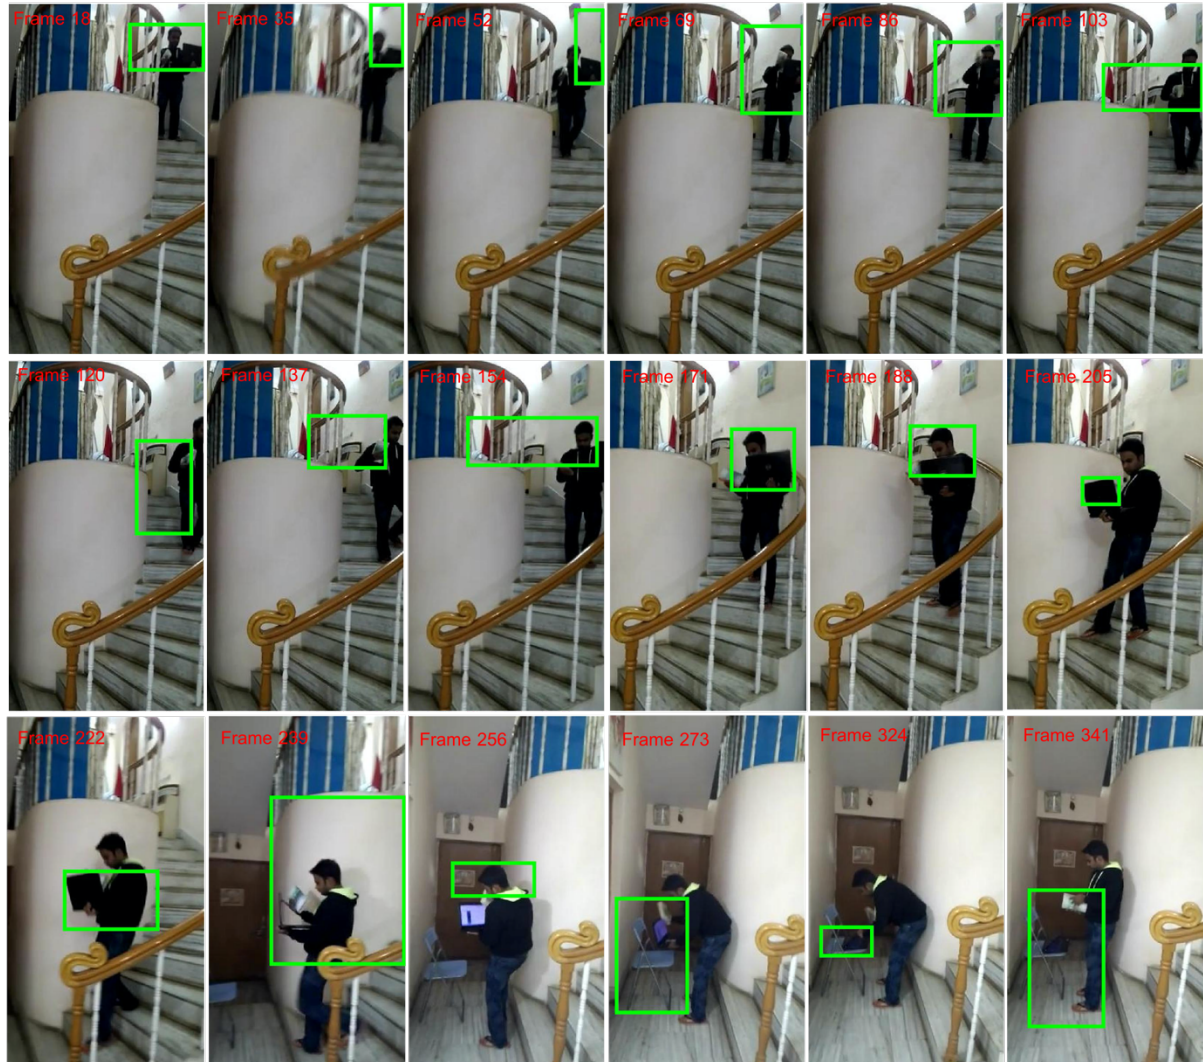

Figure 1: Class *Laptop*.

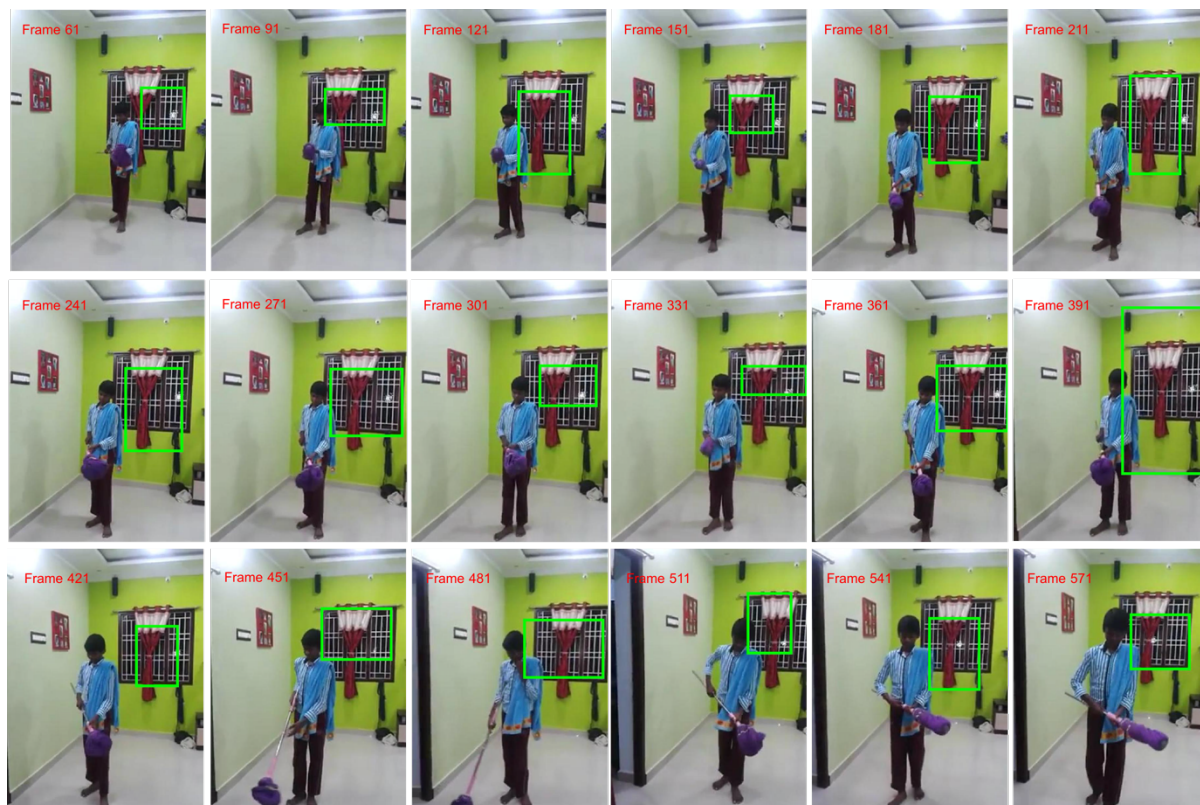

Figure 2: Class *window*.

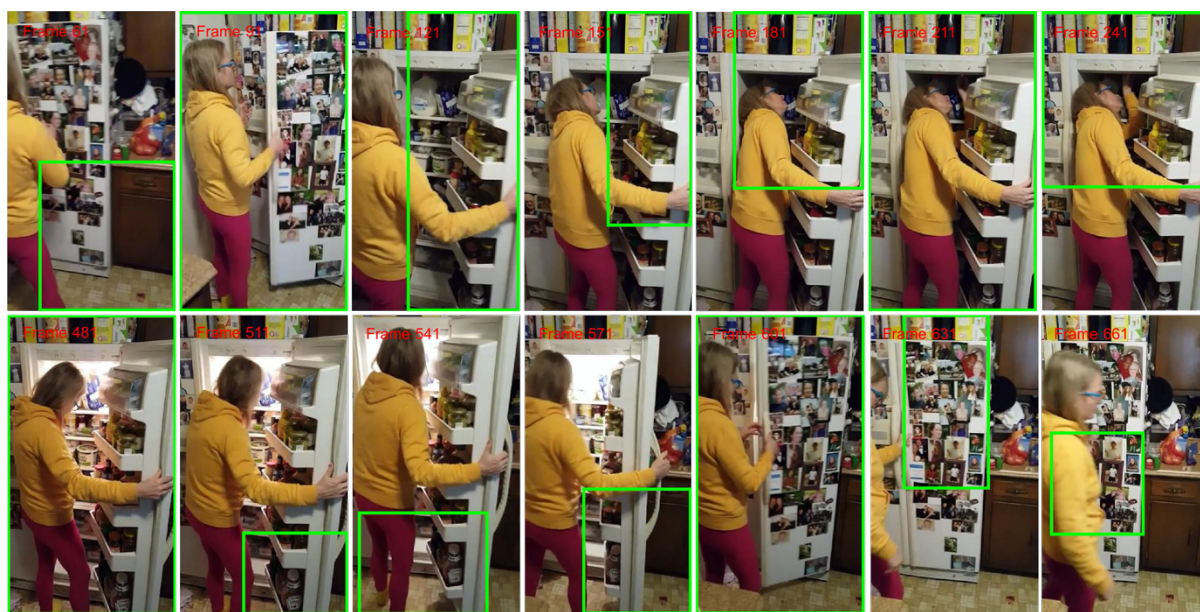

Figure 3: Class *Refrigerator*.



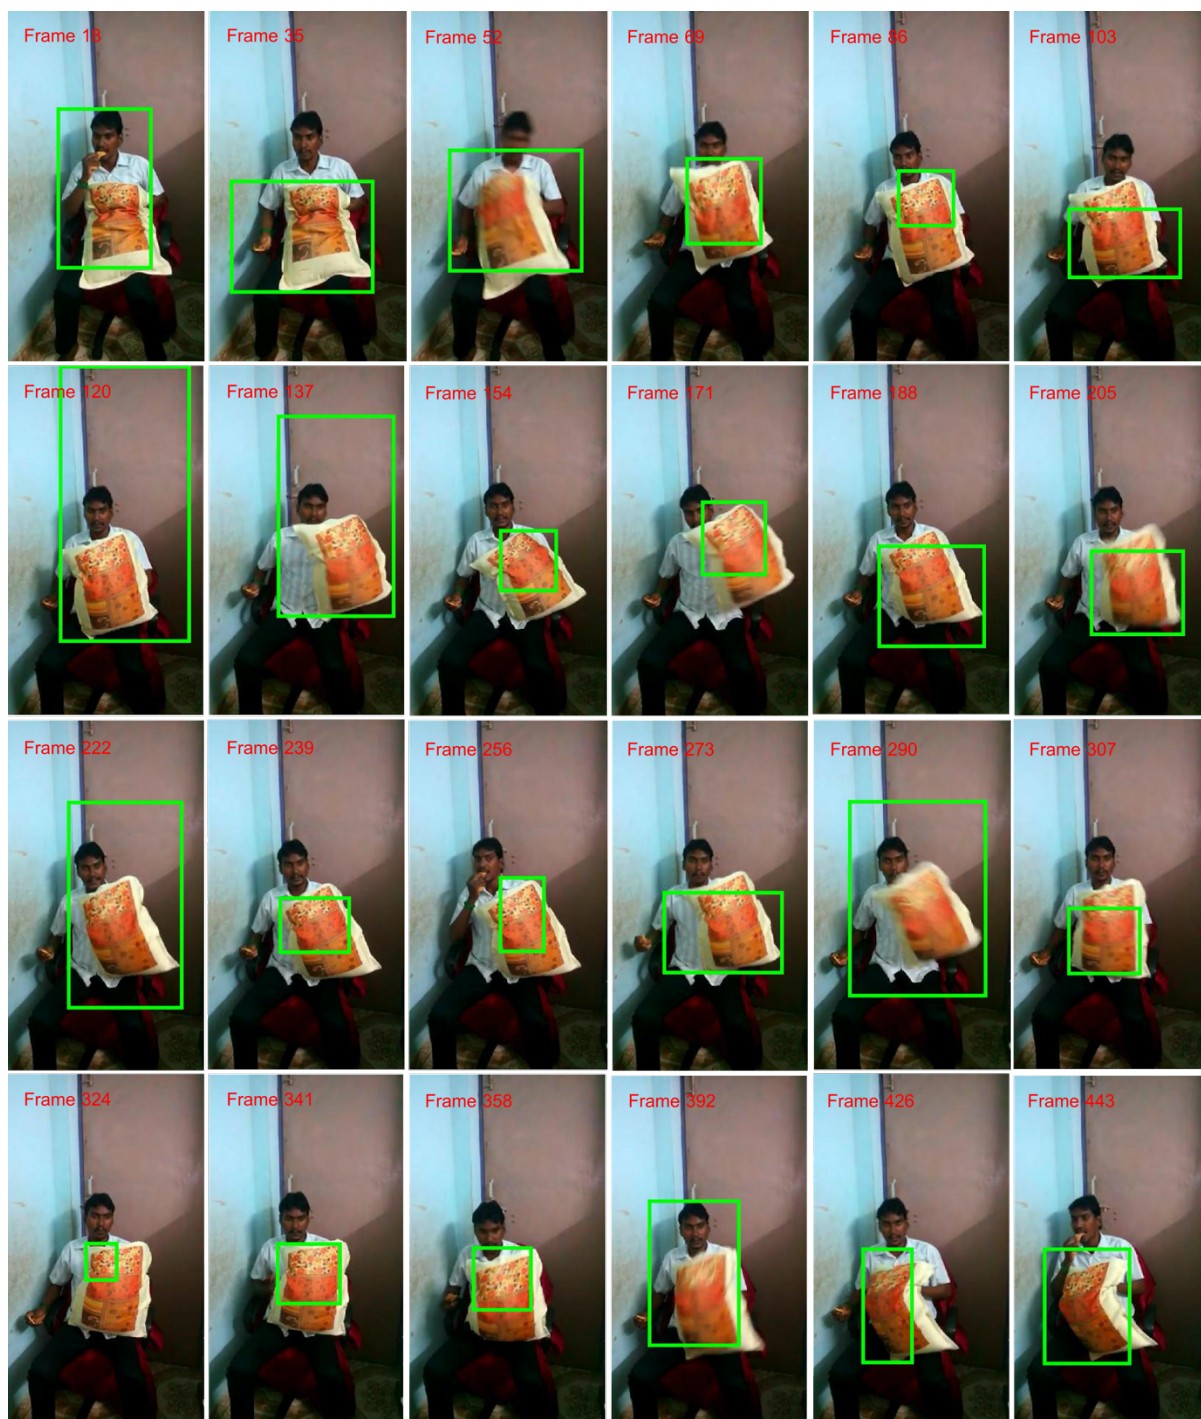

Figure 4: Class *Pillow*.
